# Supplementary material for: Formation of self-assembled gold nanoparticle supercrystals with facet-dependent surface plasmonic coupling
Source: PubMed Central journal article supplement (PMC6006263; doi:10.1038/s41467-018-04801-9), 2018-06-18
Supplement: 41467_2018_4801_MOESM1_ESM.pdf [file 41467_2018_4801_MOESM1_ESM.pdf]

## Supplementary Information

# **Formation of Self-Assembled Gold Nanoparticle Supercrystals with Facet-Dependent Surface Plasmonic Coupling**

Kaifu Bian<sup>1</sup>, Hattie Schunk<sup>1</sup>, Dongmei Ye<sup>1</sup>, Austin Hwang<sup>1</sup>, Ting Shan Luk<sup>1</sup>, Ruipeng Li<sup>2</sup>,  
Zhongwu Wang<sup>3</sup>, Hongyou Fan<sup>1,4,\*</sup>

<sup>1</sup>Sandia National Laboratories, Albuquerque, NM 87123, United States;

<sup>2</sup>NSLS II, Brookhaven National Laboratories, Upton, NY 11973, United States;

<sup>3</sup>Cornell High Energy Synchrotron Source, Ithaca, NY 14853, United States;

<sup>4</sup>Department of chemical and Biological Engineering, University of New Mexico,  
Albuquerque, NM 87106, United States.

\*Corresponding author: [hfan@sandia.gov](mailto:hfan@sandia.gov)

**List of Supplementary Figures:**

**Figure 1.** Supercrystallography analysis of a single gold SC with a different rotation axis.

**Figure 2.** Gold SCs grown under different conditions.

**Figure 3.** SAXS patterns of the reference gold NP film showing an amorphous mesostructure.

**Figure 4.** Phase diagram of solubility of gold NP in toluene-IPA solvent mixture.

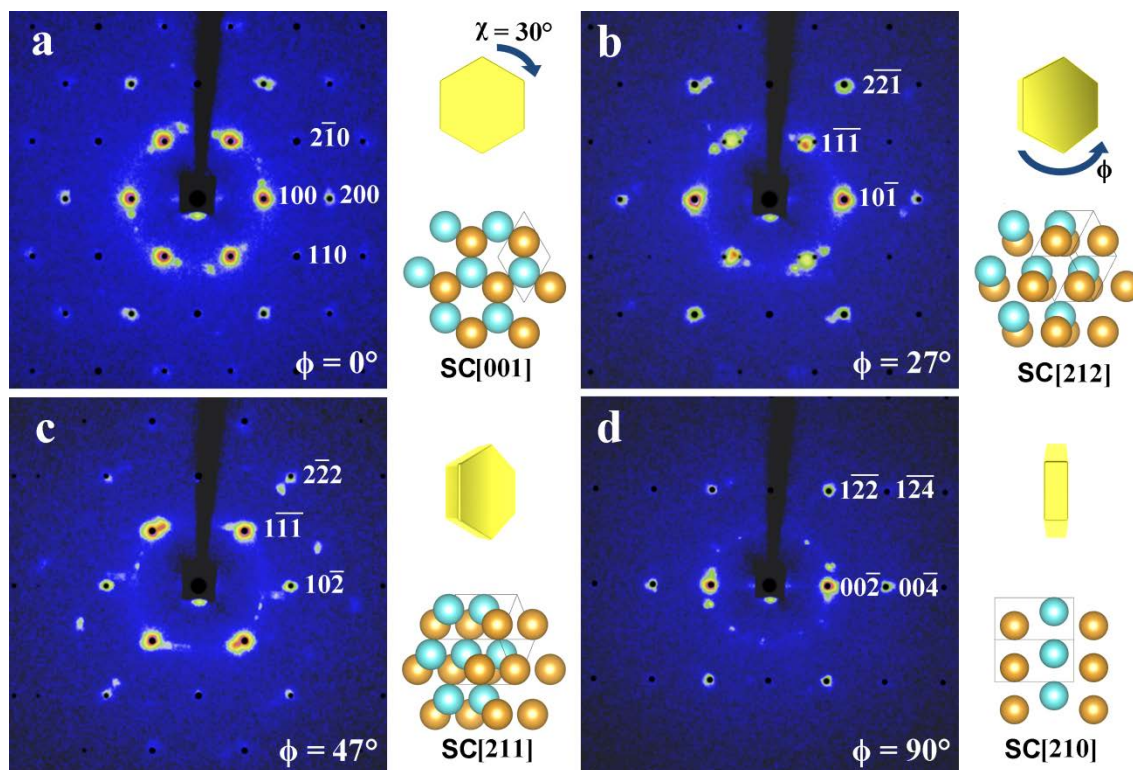

**Figure 1.** Supercrystallography analysis of a single gold SC with a different rotation axis,  $\chi = 30^\circ$  (a)-(d) SAXS patterns in selected projections. Insets are schematic illustrations of a rotating SC with X-ray beam shooting into paper. And an *hcp* superlattice in the corresponding projections as labeled by superlattice [hkl]. Three hexagonal layers are shown in two different colors to emphasize the ABAB packing for visual aid.

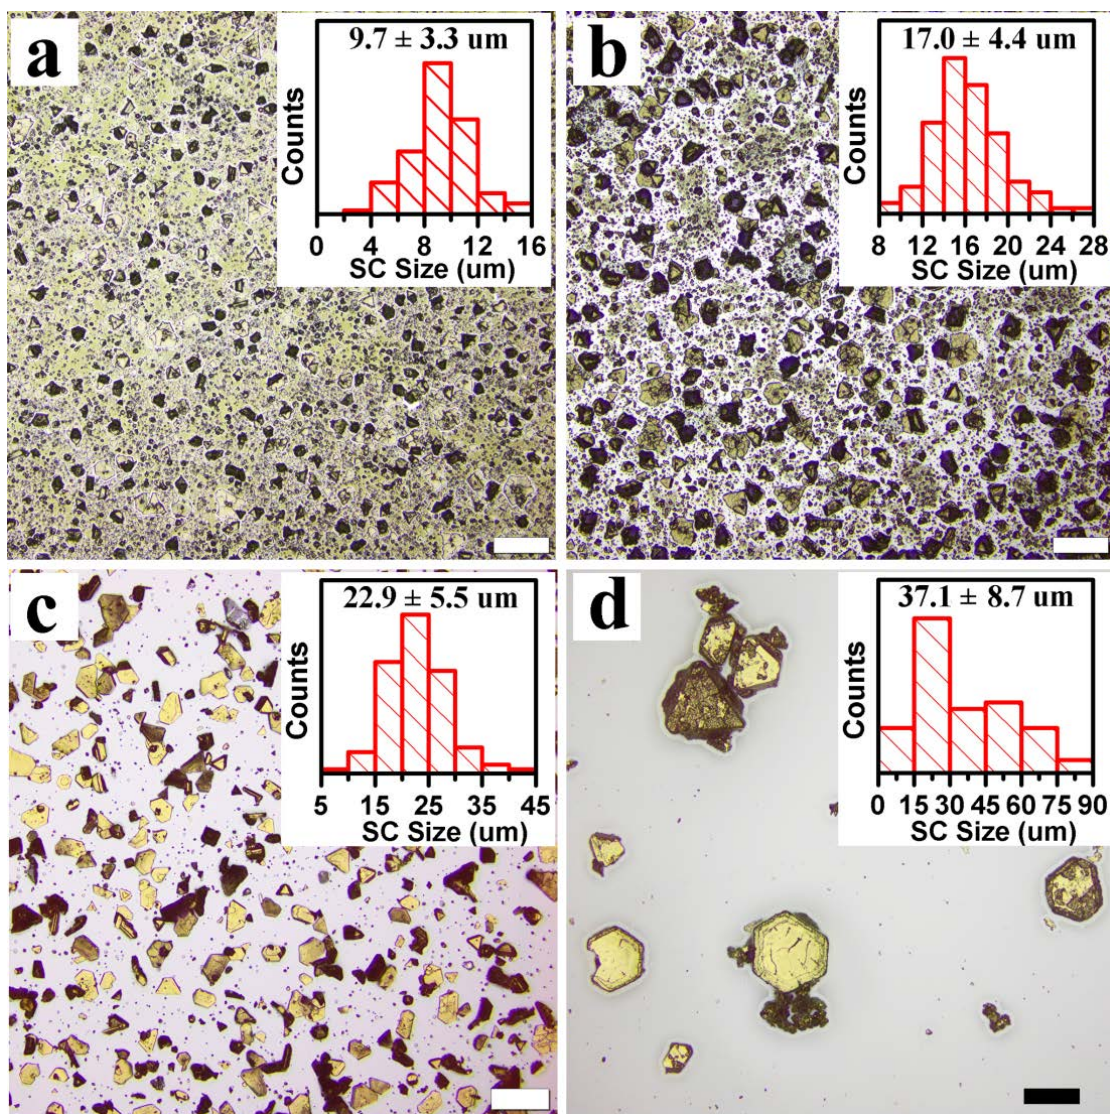

**Figure 2.** Gold SCs grown under different conditions. Fast diffusion with different initial nanoparticle concentration of (a) 2, (b) 4, and (c) 8 mg/mL and (d) slow diffusion. Insets are statistical histograms of corresponding SC sizes. Scale bars are 50  $\mu\text{m}$ .

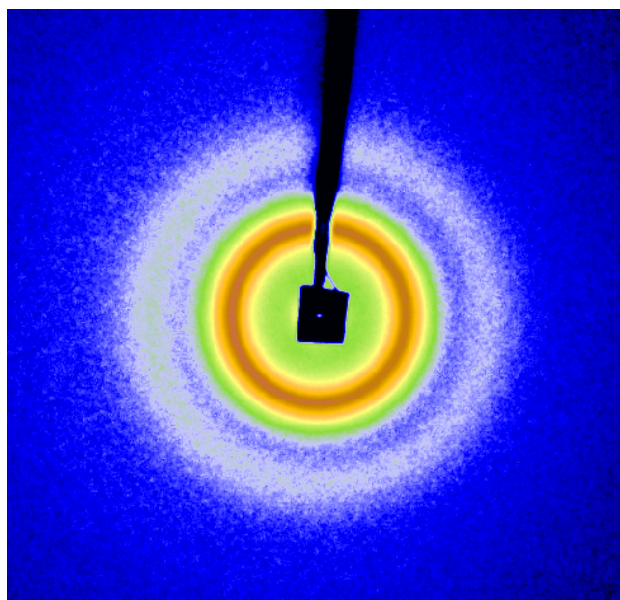

**Figure 3.** SAXS patterns of the drop-cast reference gold NP film showing an amorphous mesostructure.

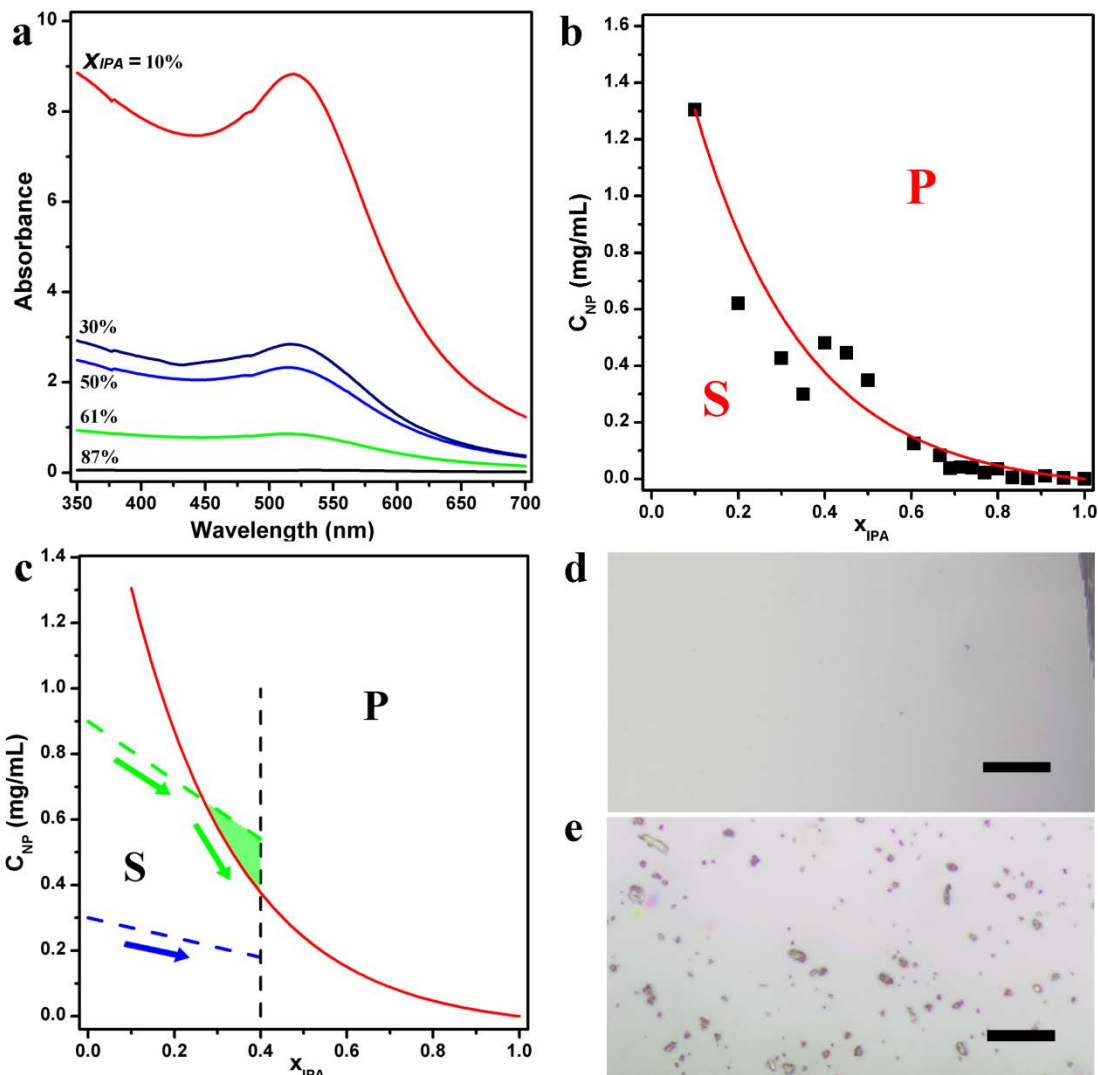

**Figure 4.** Phase diagram of solubility of gold NP in toluene-IPA solvent mixture. (a) Selected optical absorption spectra of saturated solution of gold NPs in varying volume fraction of IPA,  $x_{IPA}$ . (b) Experimentally measured (squares) and fitted (solid line) solubility curve as a function of. This phase diagram was tested by a pair of experiments with initial NP concentration  $C_{NP,0}$  of 0.3 and 0.9 mg/mL. (c) shows the dilution paths of gold solution in the two experiments. In the case of lower  $C_{NP,0}$  (blue path), the system remained in regime S and no precipitation was expected. In contrast, in the higher concentration case the dilution line (green path) intercepted the solubility curve and entered regime P to predict precipitation of quantity proportional to the enclosed area (green shade). These predictions were then confirmed by optical microscopy images. No precipitation was observed in the 0.3 mg/mL case (d) while the substrate in the 0.9 mg/mL case displayed grains of gold SC (e). These grains had size of  $\sim 1 \mu\text{m}$  and could play the role of nucleus for further supercrystal growth. Scale bars are 10  $\mu\text{m}$ . The feature at the top right corner of (d) is the edge of the substrate, as a visual aid to identify the focal plane.
